# Supplementary material for: Identifying individuals at clinical high risk for psychosis using a battery of tasks sensitive to symptom mechanisms
Source: Research Square preprint supplement (doi:10.21203/rs.3.rs-5005564/v1), 2025-05-08
Supplement: Supplementary file 1 [file 06dcdc7a0827db1f6c4c30fe.docx]

# Supplemental Methods

## Positive Symptom Tasks

*Kamin Blocking (KB)*. The KB task assesses causal learning across three blocks, during which participants learn about foods and whether or not they cause an allergic reaction. The KB control score assesses overall causal learning, attained in the final block. The KB blocking score reflects inappropriate learning of blocked cues. Overall learning may be more generally decreased across psychosis symptoms and potentially particularly in paranoia, whereas a weakened blocking effect appears to be more specific to non-paranoid delusions (1,2).

*Probabilistic Reversal Learning (PRL)*. The PRL assesses probabilistic learning under volatile conditions. Participants choose from three decks of cards, with differing probabilities of reward. Beyond learning the underlying value of each deck, participants must also learn that decks undergo shifts and transitions in their underlying value. The lose-stay rate (LSR) reflects the tendency to choose a deck after it has resulted in a loss and the win-switch rate (WSR) reflects the tendency to switch decks after receiving a reward. The WSR in particular has been associated with increased perception of environmental volatility and paranoia (3). Consistent with previous research, the PRL WSR was logarithmically transformed (4).

*Sine Wave Speech (SWS).* The SWS task assesses the influence of priors on auditory perception, with participants indicating whether or not they hear full sentences in degraded audio clips. Some of these audio clips contain nonsense and others contain actual sentences. After the first block, the actual sentences are played, modifying participant priors and leading to greater accuracy in the second block. SWS sensitivity change, *d’*, reflects change in sensitivity across the task blocks. SWS early bias, c, reflects a bias during the first block for identifying complete sentence, thus suggesting heightened pre-task priors for speech (5).

*Conditioned Hallucinations (CH)*. The CH task involves conditioning participants to hear auditory tones, when they are not present, then examining how this conditioning degrades over time. The task is modeled with the hierarchical gaussian filter, producing a variety of parameters. The present study focused on nu, the tendency to more strongly weight priors relative to sensory information, and ɷ3, the representation of volatility for conditioned hallucinations (6).

## Negative Symptom Tasks

*Gain vs. Loss Avoidance Task (GLIAT)*. The GLIATtask measures the ability to learn from gains and losses, as well as mechanisms underlying those abilities (e.g., prediction error signaling, value representation). Participants learn how four different pairs of stimuli (landscape images) are associated with point gains (vs. misses) or point losses (vs. avoiding loss); correct choices are probabilistically reinforced with probabilities of either 80% or 90%. After this learning (“acquisition”) phase, participants are presented with novel pairings of stimuli from the learning phase that previously had not been presented together and asked to choose the best stimulus, without any feedback, testing how their previous learning transfers to novel comparisons. In both phases, the key variables contrast the extent to which learning about loss aversion is dominant relative to learning about gains. The GLIAT learning variable is the difference in accuracy for 90% probability gain/miss pairs relative to 90% lose/avoid loss pairs, during the final part of the learning phase. The GLIAT transfer variable reflects the tendency to choose a stimulus associated with gains relative to stimulus associated with losses, during the transfer phase. These variables have both been found to be associated with negative symptoms (7).

The *Effort Expenditure for Rewards (EEFRT)* task assesses the willingness to work for rewards. It requires participants to choose between performing a low effort task (30 button presses within 7 seconds with the dominant hand index finger) for a lower reward value ($1) versus a high effort option (100 button presses within 21 seconds with the nondominant hand little finger) for higher reward values ($1.24-$4.30). Probability of reward receipt is manipulated across trials with cues at the start of each trial indicating a high (88%), medium (50%), or low (12%) probability of receiving money on that trial. Participants were told that they would receive a proportion of money earned as result of their decisions at the end of the task; all participants received $5 bonus for task completion. The task was performed for 20 minutes. The key dependent variable is the rate of selecting the high effort choice across probability and magnitude levels (EEFRT hard), which is associated with negative symptom severity (8,9).

The *Delay Discounting (DD)* task measures the valuation of future rewards. All participants completed a computerized version of the delay discounting task for hypothetical monetary rewards. Over the course of 27 trials, subjects were asked to choose between a smaller, immediate reward (SIR) and a larger, delayed reward (LDR) by responding via left and right button presses on a keyboard. SIRs included rewards of three sizes: small ($11-34), medium ($20-54), and large ($31-80). LDRs also included rewards of three sizes: small ($25-35), medium ($50-60), and large ($75-85). The central outcome was the performance on large reward trials (DD large) as indicated by the *k*-value which represents the hyperbolic discount parameter at indifference between choosing LDR and SIR values. Subjects’ *k*-values were estimated independently for each reward size by calculating the geometric mean of the largest *k*-value at which they chose the LDR and the smallest *k*-value at which they chose the SIR (DD large) (10,11). Consistent with previous research and the variable distribution in the present study, DD large was logarithmically transformed (12).

The *Hedonic Reactivity (HR)* task measures self-reported positive emotion experienced in relation to hedonic response to pleasant visual stimuli. Participants viewed 24 visual stimuli from the International Affective Picture System (IAPS) (8 pleasant, 8 unpleasant, 8 neutral). Three ratings were made for each stimulus: How positive the stimulus made them feel (1 not at all- 5 extremely), how negative the stimulus made them feel (1 not at all – 5 extremely), and arousal (1 extremely calm – 5 extremely excited). Each rating was separated by a 1 second interstimulus interval and participants had unlimited time to make each self-report. Stimuli differed in normative IAPS valence (unpleasant < neutral < pleasant) and arousal (pleasant, unpleasant > neutral) as would be expected. The key dependent variable was self-reported positive emotion to pleasant stimuli (HR positive) (13).

The *Computerized Finger Tapping (CFT)* task assesses initiation of volitional movements. Participants are presented with a screen that either displays “Go!” and “Stop!”; when “Go!” is on the screen they are instructed to tap the spacebar and many times as they can, with their index finger, until “Stop!” appears, which occurs after 10 seconds. Trials alternate between dominant and non-dominant hand and participants are given instructions on proper hand placement. The primary variable from this task is from the speeded performance condition of the task, which takes 5 minutes to complete. The average taps using the dominant hand (CFT speed) in this condition has been linked to negative symptoms and was used in the present study (14,15).

## Disorganization Symptom Tasks

The *Ebbinghaus Illusion (EI)* task presents participants with the classic Ebbinghaus illusion, which consists of two arrays of nine dots that are immediately next to one another. Participants are asked to focus on the center dot of each array and determine which of the two are largest. Across trials, the outer dots in each array vary in size, such that sometimes they will be smaller or larger. Importantly smaller outer dots creates the illusion that the center dot is larger; in some cases this will helpfully make the larger of the two target dots look even larger, but in other cases (e.g., larger outer dots) these outer dots will be misleading and make the larger target dot appear smaller than it is. Previous work indicates that disorganization is related to worse visual context processing and thus reduced susceptibility to the Ebbinghaus illusion, such that performance on the task is not improved by helpful outer dot context and is not negatively impacted by misleading outer dots (16,17). The present study used a context sensitivity index (EI context), which combines helpful and misleading context trials to create and overall measure of the extent to which a participant’s performance is affected by the illusion in the typical direction.

The *Mooney Faces (MF)* task presents participants with ambiguous, black and white images and then requires them to indicate whether or not they see a face. In fact, these stimuli are degraded pictures of human faces, with all shades of gray removed. Faces are varyingly presented upright or inverted, across trials. Accurately perceiving faces on this task requires grouping the fragmentary visual information into a coherent how, based on the perceptual principle of closure. Considerable previous work indicates with psychosis, and disorganization symptoms in particular, show a reduced ability to identify these faces, particularly in the upright condition (18–20). A recent small study of CHR-P individuals (*N* = 37) indicated a finding in the opposite direction, that CHR-P individuals were more likely to perceive faces in both the upright and inverted conditions (21). The present study thus examined MF upright and MF inverted separately to capture the extent to which faces are observed in both of these conditions.

# Supplemental Results

A model without either of the Mooney Faces remained significantly better fitting than the intercept-only model (Wald test *p* < .01; AIC = 1596). Sensitivity remained similar (.86), but specificity decreased (.24), with relatedly somewhat smaller positive (.47) and negative predictive value (.69). Significant predictors largely mirrored the results for the model with Mooney Faces variables. For the CHR-P vs. HC equation, KB control (OR = .76, p = .028), PRL WSR (OR = 1.40, p = .010), and SWS c (OR = 1.46, p = .004) all remained significant predictors (*p* < .05); however, CFT speed was no longer a significant predictor and instead HR positive emerged as a significant predictor (OR = 1.32, p = .025). For the CHR-P vs. CLN equation, in the absence of Mooney Faces variables, the SWS c became a significant predictor (OR = 1.46, p = .025). For the CHR-P vs. PLE equation, EI context remained a significant predictor (OR = .76, p = .020) and no others emerged.

| Supplemental Table 1. Descriptive statistics for continuous predictors | | | | | | | | | | | | |
| --- | --- | --- | --- | --- | --- | --- | --- | --- | --- | --- | --- | --- |
|  | CHR | | | PLE | | | CLN | | | HC | | |
|  | N | M | SD | N | M | SD | N | M | SD | N | M | SD |
| KB Blocking | 199 | 0.00 | 0.75 | 95 | -0.05 | 0.73 | 71 | -0.18 | 0.72 | 119 | -0.06 | 0.75 |
| KB Control | 197 | 0.60 | 0.57 | 94 | 0.63 | 0.51 | 72 | 0.70 | 0.43 | 120 | 0.50 | 0.68 |
| PRL WSR | 216 | -1.20 | 0.56 | 106 | -1.12 | 0.52 | 73 | -1.36 | 0.50 | 129 | -1.37 | 0.53 |
| PRL LSR | 216 | 0.23 | 0.20 | 106 | 0.23 | 0.19 | 73 | 0.27 | 0.22 | 129 | 0.26 | 0.22 |
| SWS d' | 212 | -0.08 | 0.82 | 106 | -0.10 | 0.93 | 73 | 0.01 | 0.86 | 130 | -0.12 | 0.86 |
| SWS c | 212 | -0.19 | 0.67 | 106 | -0.27 | 0.57 | 73 | -0.41 | 0.46 | 130 | -0.39 | 0.62 |
| CH nu (prior) | 207 | 0.68 | 0.70 | 99 | 0.66 | 0.50 | 65 | 0.53 | 0.46 | 124 | 0.67 | 0.63 |
| CH omega3 | 207 | -6.02 | 0.48 | 99 | -6.02 | 0.50 | 65 | -6.08 | 0.43 | 122 | -5.94 | 0.43 |
| HR positive | 210 | 3.89 | 0.75 | 104 | 3.88 | 0.75 | 73 | 3.98 | 0.73 | 131 | 4.03 | 0.59 |
| EEFRT hard | 213 | 0.53 | 0.25 | 103 | 0.55 | 0.26 | 70 | 0.54 | 0.27 | 128 | 0.57 | 0.26 |
| DD large | 211 | -1.64 | 0.36 | 104 | -1.63 | 0.37 | 74 | -1.69 | 0.35 | 129 | -1.70 | 0.37 |
| CFT speed | 216 | 54.42 | 8.45 | 105 | 55.29 | 10.96 | 74 | 55.84 | 8.33 | 127 | 55.72 | 8.21 |
| PL winvla90 | 232 | 0.03 | 0.17 | 107 | 0.00 | 0.18 | 74 | 0.01 | 0.17 | 134 | 0.03 | 0.17 |
| PL gainvla | 232 | 0.53 | 0.25 | 107 | 0.57 | 0.26 | 74 | 0.56 | 0.25 | 134 | 0.52 | 0.28 |
| EI context | 215 | 74.39 | 33.82 | 104 | 64.47 | 45.58 | 71 | 69.14 | 41.44 | 130 | 79.88 | 29.06 |
| MF inverted | 208 | 37.76 | 23.09 | 98 | 30.23 | 19.06 | 69 | 27.23 | 18.94 | 116 | 27.61 | 21.08 |
| MF upright | 206 | 79.50 | 13.04 | 98 | 77.74 | 11.19 | 69 | 77.01 | 13.92 | 116 | 76.74 | 13.86 |
| *Note*. . CHR-P = clinical high risk for psychosis, PLE = psychosis like experiences (not meeting CHR-P criteria), CLN = current or recent mental health diagnoses, and HC = healthy controls. | | | | | | | | | | | | |

| Supplemental Table 2. Correlations between NAPLS-RC and tasks in CHR-P sub-sample | | |
| --- | --- | --- |
| Task Variable | *r* | *p* |
| KB Blocking | -.04 | .566 |
| KB Control | .16 | .061 |
| PRL WSR | **.19** | **.008** |
| PRL LSR | **-.14** | **.042** |
| SWS d' | **.17** | **.023** |
| SWS c | -.04 | .555 |
| CH ν (prior) | .02 | .741 |
| CH ɷ3 | **.16** | **.025** |
| HR positive | .11 | .134 |
| EEFRT hard | .07 | .361 |
| DD large | .06 | .402 |
| CFT speed | .10 | .225 |
| GLIAT learning | .01 | .896 |
| GLIAT transfer | .02 | .746 |
| EI context | .07 | .324 |
| MF inverted | -.02 | .842 |
| MF upright | .04 | .626 |
| *Note.* All task variables have been keyed in the direction of greater pathology; however, MF variables have been found to relate to CHR-P status in the opposite direction (see manuscript). Significant (*p* < .05) correlations are in bold. | | |

| Supplemental Table 3. Correlations between NAPLS-RC and tasks in full sample | | |
| --- | --- | --- |
| Task Variable | *r* | *p* |
| KB Blocking | -.01 | .860 |
| KB Control | .09 | .080 |
| PRL WSR | **.18** | **.000** |
| PRL LSR | **-.12** | **.007** |
| SWS d' | **.11** | **.023** |
| SWS c | .04 | .391 |
| CH ν (prior) | .07 | .190 |
| CH ɷ3 | **.10** | **.045** |
| HR positive | **.10** | **.034** |
| EEFRT hard | .08 | .108 |
| DD large | -.02 | .713 |
| CFT speed | .09 | .065 |
| GLIAT learning | .00 | .966 |
| GLIAT transfer | .02 | .688 |
| EI context | .04 | .445 |
| MF inverted | **-.13** | **.015** |
| MF upright | -.02 | .707 |
| *Note.* All task variables have been keyed in the direction of greater pathology; however, MF variables have been found to relate to CHR-P status in the opposite direction (see manuscript). Significant (*p* < .05) correlations are in bold. | | |

| Supplemental Table 4. Multiple regression predicting NAPLS-RC in full sample | | |
| --- | --- | --- |
| Predictor | *β* | *p* |
| (Intercept) | 0.00 | 1 |
| KB Blocking | -0.04 | .356 |
| KB Control | 0.04 | .417 |
| PRL WSR | **0.17** | **.001** |
| PRL LSR | -0.08 | .097 |
| SWS d' | **0.11** | **.026** |
| SWS c | 0.05 | .331 |
| CH ν (prior) | -0.01 | .858 |
| CH ɷ3 | 0.09 | .075 |
| HR positive | **0.11** | **.021** |
| EEFRT hard | 0.06 | .201 |
| DD large | 0.03 | .469 |
| CFT speed | **0.10** | **.046** |
| GLIAT learning | 0.01 | .868 |
| GLIAT transfer | 0.03 | .437 |
| EI context | 0.01 | .861 |
| MF inverted | **-0.19** | **.006** |
| MF upright | 0.09 | .168 |
| *Note.* All task variables have been keyed in the direction of greater pathology; however, MF variables have been found to relate to CHR-P status in the opposite direction (see manuscript). Significant (*p* < .05) regression coefficients are in bold. | | |

# Supplemental References

1. Corlett PR, Fletcher PC. The neurobiology of schizotypy: Fronto-striatal prediction error signal correlates with delusion-like beliefs in healthy people. Neuropsychologia. 2012 Dec 1;50(14):3612–20.

2. Rossi-Goldthorpe R, Silverstein SM, Gold JM, Schiffman JE, Waltz JA, Williams TF, et al. Different learning aberrations relate to delusions with different contents. Brain. in press;

3. Suthaharan P, Reed EJ, Leptourgos P, Kenney JG, Uddenberg S, Mathys CD, et al. Paranoia and belief updating during the COVID-19 crisis. Nat Hum Behav. 2021 Sep;5(9):1190–202.

4. Sheffield JM, Suthaharan P, Leptourgos P, Corlett PR. Belief Updating and Paranoia in Individuals With Schizophrenia. Biol Psychiatry Cogn Neurosci Neuroimaging [Internet]. 2022 Apr 14 [cited 2022 Jul 20]; Available from: https://www.sciencedirect.com/science/article/pii/S2451902222000799

5. Alderson-Day B, Lima CF, Evans S, Krishnan S, Shanmugalingam P, Fernyhough C, et al. Distinct processing of ambiguous speech in people with non-clinical auditory verbal hallucinations. Brain. 2017 Sep 1;140(9):2475–89.

6. Powers AR, Mathys C, Corlett PR. Pavlovian conditioning–induced hallucinations result from overweighting of perceptual priors. Science. 2017 Aug 11;357(6351):596–600.

7. Gold JM, Waltz JA, Matveeva TM, Kasanova Z, Strauss GP, Herbener ES, et al. Negative Symptoms and the Failure to Represent the Expected Reward Value of Actions: Behavioral and Computational Modeling Evidence. Arch Gen Psychiatry. 2012 Feb 1;69(2):129–38.

8. Strauss GP, Whearty KM, Morra LF, Sullivan SK, Ossenfort KL, Frost KH. Avolition in schizophrenia is associated with reduced willingness to expend effort for reward on a Progressive Ratio task. Schizophr Res. 2016;170(1):198–204.

9. Treadway MT, Buckholtz JW, Schwartzman AN, Lambert WE, Zald DH. Worth the ‘EEfRT’? The effort expenditure for rewards task as an objective measure of motivation and anhedonia. PloS One. 2009;4(8):e6598.

10. Kirby KN, Petry NM, Bickel WK. Heroin addicts have higher discount rates for delayed rewards than non-drug-using controls. J Exp Psychol Gen. 1999;128(1):78.

11. Horan WP, Johnson MW, Green MF. Altered experiential, but not hypothetical, delay discounting in schizophrenia. J Abnorm Psychol. 2017;126(3):301.

12. Gray JC, Amlung MT, Acker JD, Sweet LH, MacKillop J. Item-based analysis of delayed reward discounting decision making. Behav Processes. 2014 Mar 1;103:256–60.

13. Strauss GP, Ruiz I, Visser KH, Crespo LP, Dickinson EK. Diminished Hedonic response in neuroleptic-free youth at ultra high-risk for psychosis. Schizophr Res Cogn. 2018;12:1–7.

14. Moore TM, Reise SP, Gur RE, Hakonarson H, Gur RC. Psychometric properties of the Penn Computerized Neurocognitive Battery. Neuropsychology. 2015;29(2):235–46.

15. Mittal VA, Ellman LM, Strauss GP, Walker EF, Corlett PR, Schiffman J, et al. Computerized Assessment of Psychosis Risk. J Psychiatry Brain Sci. 2021;6(3):e210011.

16. Silverstein SM, Keane BP. Perceptual Organization Impairment in Schizophrenia and Associated Brain Mechanisms: Review of Research from 2005 to 2010. Schizophr Bull. 2011 Jul 1;37(4):690–9.

17. Mittal VA, Gupta T, Keane BP, Silverstein SM. Visual context processing dysfunctions in youth at high risk for psychosis: Resistance to the Ebbinghaus illusion and its symptom and social and role functioning correlates. J Abnorm Psychol. 2015;124(4):953–60.

18. Uhlhaas PJ, Silverstein SM. Perceptual Organization in Schizophrenia Spectrum Disorders: Empirical Research and Theoretical Implications. Psychol Bull. 2005;131(4):618–32.

19. Uhlhaas PJ, Phillips WA, Silverstein SM. The course and clinical correlates of dysfunctions in visual perceptual organization in schizophrenia during the remission of psychotic symptoms. Schizophr Res. 2005 Jun 15;75(2):183–92.

20. Rivolta D, Castellanos NP, Stawowsky C, Helbling S, Wibral M, Grützner C, et al. Source-Reconstruction of Event-Related Fields Reveals Hyperfunction and Hypofunction of Cortical Circuits in Antipsychotic-Naive, First-Episode Schizophrenia Patients during Mooney Face Processing. J Neurosci. 2014 Apr 23;34(17):5909–17.

21. Silverstein SM, Thompson JL, Gold JM, Schiffman J, Waltz JA, Williams TF, et al. Increased face detection responses on the mooney faces test in people at clinical high risk for psychosis. Npj Schizophr. 2021 May 17;7(1):1–7.
